# Supplementary material for: EMAGINE–Study protocol of a randomized controlled trial for determining the efficacy of a frequency tuned electromagnetic field treatment in facilitating recovery within the subacute phase following ischemic stroke
Source: PubMed Central journal article supplement (PMC10196621; doi:10.3389/fneur.2023.1148074), 2023-05-05
Supplement: Data_Sheet_6.pdf [file Data_Sheet_6.pdf]

## **S6 EMAGINE Investigators and coordinators**

### Atrium Health Carolinas Rehabilitation (The Charlotte-Mecklenburg Hospital Authority)

Dr. Matthew Shall (PI), Tami Pringnitz Guerrier, Christine Patino, Brian Adams

### Baylor Scott & White Institute for Rehabilitation

Dr. Simon Driver (Co-PI), Dr. Rosemary Dubiel (Co-PI), Claudia Cohen, Lacy McDonald

### Brooks Rehabilitation Hospital – University Campus

Dr. Emily Fox (PI), Dr. Lou DeMark, Dr. Cassandra List, Dr. Meghan Kettles, Hannah Snyder

### Christine E. Lynn Rehabilitation Center for The Miami Project/Jackson Memorial Hospital

Dr. Sebastian Koch (PI), Dr. Lauren Shapiro (Co-PI), Dr. W. Dalton Dietrich, III, Iszet Campo-Bustillo, Dr. Nilanjana Datta

### Kessler Institute of Rehabilitation

Dr. Steven Kirshblum (PI), Dr. Ghaith Androwis (Co-PI), Dr. Guang Yue, Dr. Irene Ward, Dr. Amanda Engler, Sally Al-Rabadi

### MedStar National Rehabilitation Hospital (NRH)

Dr. Richard Zorowitz (PI), Kathaleen Brady

### Moss Rehabilitation Research Institute (MRR)

Dr. Ning Cao (PI), Dr. Alberto Esquenazi, Dr. Dylan Edwards, Jaun May, Grace Loscalzo, Tori Sprowl

### NYP Brooklyn Methodist Hospital Outpatient Rehabilitation

Dr. Joel Stein (PI), Dr. Jason Edwards (Co-PI), Dr. Holly Batistick-Aufox, Joy Rutherford

### Shirley Ryan Abilitylab

Dr. Elliot Roth (PI), Dr. Arun Jayaraman (Co-PI), Dr. Sara Prokup, Dr. Joe Harris

### Spaulding Rehabilitation Hospital

Dr. Randie Black-Schaffer (PI), Dr. David Lin (Co-PI), Dr. Paolo Bonato, Dr. Priyanca Shah, Jenny Min

### TIRR Memorial Hermann Hospital

Dr. Sean Savitz (PI), Emily Stevens

### The University of Kansas Medical Center (KUMC)

Dr. Sandra Billinger (Co-PI), Dr. Sarah Eickmeyer (Co-PI), Bria Bartsch, Sasha (Alexandra) Moores

### UCLA and California Rehabilitation Institute

Dr. Mersedeh Bahr Hosseini (Co-PI), Dr. Michael Su (Co-PI:), Dr. Jeffery Saver, Dr. Steven Cramer, Dr. Pamela Roberts, Rocky Pang, Dr. Adrienne Ingalla, Gilda Avila

### BrainQ Technologies Ltd.

Assaf Lifshitz, Arielle Hochberg, Yotam Drechsler, Yael Djemal Kay, Batsheva Weisinger, Dr. Yaron Segal, Dr. Nadav Bitton, Iren Basanov, Dr. Allison Nogi, Dr. Vincent Santucci, Dr. Jessica Royal, Dr. Ana Parabucki, Dr. Adina Bitton, Prof. Esther Shohami
